# Supplementary material for: Consumers’ Exposure to Nutrition and Health Claims on Pre-Packed Foods: Use of Sales Weighting for Assessing the Food Supply in Slovenia
Source: Nutrients. 2015 Nov 12;7(11):9353–68. doi: 10.3390/nu7115474 (PMC4663602; doi:10.3390/nu7115474)
Supplement: Supplementary file 1 [file nutrients-07-05474-s001.xlsx]

## Sheet: Table S1
Table S1. Consumer’s exposure to nutrition and health claims and symbols on prepacked foods according to the FOODEX2 categorisation.
			nutrition claim(s)		health claim(s)		nutrition and/or health claim(s)		health symbol		nutrition declaration
FOODEX2	Food category	N	SCE	SWE	SCE	SWE	SCE	SWE	SCE	SWE	SCE	SWE
	Milk	53	0.528302	0.681092	0.113208	0.0273495	0.528302	0.681092	0.0188679	0.00657999	0.943396	0.971064
A02LY	Cow milk, whole	25	0.4	0.673738	0	0	0.4	0.673738	0	0	0.92	0.990142
A02LZ	Cow milk, semi skimmed	23	0.695652	0.712274	0.217391	0.0571435	0.695652	0.712274	0	0	0.956522	0.937091
	Yoghurt and fermented milk drinks	294	0.653061	0.64258	0.510204	0.461668	0.659864	0.647251	0.142857	0.203415	0.935374	0.978509
A02NE	Yoghurt	256	0.628906	0.62511	0.480469	0.449286	0.632812	0.62917	0.164062	0.219617	0.933594	0.97919
A02NG	Yoghurt, cow milk, plain	80	0.7625	0.63275	0.45	0.321754	0.775	0.640352	0.175	0.220206	0.975	0.997148
A02NH	Yoghurt, cow milk, flavoured	172	0.581395	0.616522	0.505814	0.595557	0.581395	0.616522	0.162791	0.219001	0.930233	0.958748
	Butter and spreads	196	0.505102	0.494861	0.178571	0.260799	0.556122	0.598718	0	0	0.785714	0.707093
A039C	Butter	33	0.181818	0.214983	0.030303	0.0091391	0.181818	0.214983	0	0	0.545455	0.146369
A039B	Spreadable vegetable fat emulsions	106	0.59434	0.590873	0.207547	0.221888	0.613208	0.594829	0	0	0.735849	0.637419
	Cheese	335	0.208955	0.298542	0.0208955	0.10389	0.208955	0.298542	0.00895522	0.0813243	0.450746	0.719552
A02QF	Fresh uncured cheese	87	0.241379	0.383091	0.0574713	0.169956	0.241379	0.383091	0.0344828	0.133998	0.62069	0.886457
A02RA	Brined cheese	20	0.2	0.0519345	0	0	0.2	0.0519345	0	0	0.4	0.244095
A02RH	Soft ripened cheese	45	0.111111	0.0177154	0	0	0.111111	0.0177154	0	0	0.4	0.33803
A02ST	Firm ripened cheeses	88	0.238636	0.151601	0.0113636	0.00180312	0.238636	0.151601	0	0	0.409091	0.53318
	Other dairy products	138	0.202899	0.102174	0.0362319	0.0230026	0.202899	0.102174	0	0	0.695652	0.626079
A02MK	Cream and cream products	38	0	0	0	0	0	0	0	0	0.763158	0.908523
A031F	Whole eggs	42	0.190476	0.0115689	0.047619	0.00694745	0.238095	0.0185164	0	0	0.142857	0.0566965
	Frozen fruit & vegetables	111	0.036036	0.00874061	0.00900901	0.000322929	0.036036	0.00874061	0	0	0.900901	0.902223
	Frozen ready meals	239	0.104603	0.0556295	0.0209205	0.00521096	0.108787	0.057511	0	0	0.891213	0.945925
A00CV	Breakfast cereals	276	0.793478	0.834816	0.311594	0.192445	0.800725	0.835943	0.0543478	0.071725	0.956522	0.973188
A004V	Breads and similar products	297	0.468013	0.102784	0.0841751	0.0284474	0.468013	0.102784	0.020202	0.0128135	0.592593	0.258811
A009T	Fine bakery wares (biscuits)	323	0.260062	0.220431	0.0495356	0.0211631	0.260062	0.220431	0	0	0.532508	0.506459
	Pasta & rice	436	0.268349	0.111888	0.114679	0.128747	0.31422	0.228148	0.0298165	0.00679422	0.857798	0.795017
A007D	Pasta and similar products	356	0.261236	0.066593	0.140449	0.176684	0.317416	0.22614	0.0365169	0.00932394	0.859551	0.743122
A001C	Cereal grains: Rice grains	80	0.3	0.233541	0	0	0.3	0.233541	0	0	0.85	0.934394
	Fruit juice & smoothies	240	0.945833	0.991919	0.145833	0.136643	0.945833	0.991919	0	0	0.945833	0.998078
A039L	Fruit juices	118	0.915254	0.977377	0.220339	0.378359	0.915254	0.977377	0	0	0.915254	0.995195
A03BB	Fruit nectar	104	0.990385	0.999962	0	0	0.990385	0.999962	0	0	0.971154	0.9988
	Soft drinks and water	459	0.627451	0.414822	0.087146	0.0976697	0.62963	0.415339	0	0	0.830065	0.621231
A03DK	Drinking water	137	0.642336	0.466204	0.167883	0.177715	0.649635	0.46716	0	0	N/A	N/A
A03DQ	Natural mineral water	61	0.262295	0.288733	0.0819672	0.137195	0.278689	0.290025	0	0	N/A	N/A
A03DR	Still natural mineral water	38	0.131579	0.145001	0.0526316	0.0045801	0.157895	0.148394	0	0	N/A	N/A
A03DS	Carbonated natural mineral water	23	0.478261	0.377135	0.130435	0.218761	0.478261	0.377135	0	0	N/A	N/A
A03DY	Flavoured bottled water	76	0.947368	0.970678	0.236842	0.292896	0.947368	0.970678	0	0	0.960526	0.98966
A03DZ	Soft drinks	271	0.549815	0.314526	0.0295203	0.00134898	0.549815	0.314526	0	0	0.845018	0.858349
A03FZ	Functional drinks	41	1	1	0.219512	0.0521052	1	1	0	0	1	1
A03GA	Energy drinks	21	1	1	0	0	1	1	0	0	1	1
A03GB	Isotonic and sport drinks	20	1	1	0.45	0.15715	1	1	0	0	1	1
	Teas	362	0.212707	0.33021	0.190608	0.0501203	0.314917	0.336876	0	0	0.129834	0.176519
A03HQ	Tea leaves	68	0.176471	0.355658	0.176471	0.360708	0.205882	0.398448	0	0	0.176471	0.376548
A03LG	Herbal and other non-tea infusions	294	0.221088	0.328409	0.193878	0.0281441	0.340136	0.33252	0	0	0.119048	0.162365
	Peas, beans & lentils	97	0.103093	0.0207806	0.0618557	0.0231856	0.113402	0.0250199	0.0412371	0.0188692	0.556701	0.600814
	Processed meats	429	0.146853	0.0792496	0.0675991	0.0442938	0.172494	0.105259	0.034965	0.0309226	0.445221	0.619186
	Processed seafood	237	0.248945	0.348551	0.0337553	0.00640257	0.257384	0.350981	0.00421941	0.000972165	0.485232	0.703092
	Ready meals - full meal	96	0.1875	0.101529	0	0	0.1875	0.101529	0	0	0.885417	0.843038
	Ready meals - other	133	0.0601504	0.03423	0.0225564	0.00748706	0.0601504	0.03423	0	0	0.593985	0.641463
A036N	Vegetable fats and oils	194	0.329897	0.117454	0.195876	0.0596471	0.376289	0.139793	0.0979381	0.0352598	0.556701	0.220809
A036P	Olive oils	61	0.213115	0.367566	0.196721	0.27017	0.278689	0.444161	0.180328	0.258801	0.639344	0.501191
A036T	Seed oils	133	0.383459	0.103612	0.195489	0.0479959	0.421053	0.122948	0.0601504	0.0228882	0.518797	0.205291
A037D	Sunflower seed oil, edible	26	0.461538	0.182783	0.269231	0.0610943	0.576923	0.218451	0.115385	0.0153801	0.692308	0.31
A037H	Pumpkinseed oil	21	0.285714	0.127962	0.0952381	0.0402048	0.285714	0.127962	0.047619	0.0160354	0.238095	0.0505784
A03TH	Milk imitates	35	0.942857	0.975579	0.0571429	0.128987	0.942857	0.975579	0	0	1	1
A03TJ	Soya drink	18	1	1	0.111111	0.220846	1	1	0	0	1	1
A03TQ	Yoghurt imitates	27	0.814815	0.815884	0.62963	0.719499	0.814815	0.815884	0	0	1	1
A035M	Chewing gum	55	0	0	0.0909091	0.029821	0.0909091	0.029821	0	0	0.709091	0.796884
	TOTAL	5104	0.36873	0.371003	0.125392	0.0873264	0.388911	0.377873	0.023315	0.0155516	0.669867	0.594667

## Sheet: Table S2
Table S2. Prevalence of nutrition and health claims on prepacked foods in the large supermarket (LAS), two neighbourhood stores (NS) and the discounter (DIS).
	%Products with nutrition claim(s)								%Products with health claim(s)								%Products with nutrition and/or health claim(s)
Food category	LAS		NS1		NS2		DIS		LAS		NS1		NS2		DIS		LAS		NS1		NS2		DIS
Milk	0.685714		0.645161		0.575758		0	b	0.171429		0.193548		0.181818		0.111111	b	0.685714		0.645161		0.575758		0.111111	b
Yoghurt and fermented milk drinks	0.677419		0.699301		0.713376		0.44	b	0.534562		0.594406		0.598726		0.493333	b	0.686636		0.706294		0.719745		0.493333	b
Butter and spreads	0.505814		0.412371		0.45		0.227273	b	0.186047		0.247423		0.225		0.0454545	b	0.55814		0.515464		0.5375		0.227273	b
Cheese	0.200692	b	0.25		0.293478		0.290909		0.0138408		0.037037		0.0652174		0.236364	a	0.200692	b	0.25		0.293478		0.290909
Other diary products	0.232759		0.190476		0.176471		0.0882353	b	0.0431034		0.047619		0.0588235	a	0.0294118	b	0.232759		0.190476		0.176471		0.0882353	b
Whole eggs	0.205882	a	0		0.0833333		0		0.0588235		0.0769231		0.0833333		0	b	0.264706	a	0.0769231		0.166667		0	b
Frozen fruit & vegetables	0		0		0.114286	a	0.0714286		0		0		0.0285714	a	0		0		0		0.114286	a	0.0714286
Frozen ready meals	0.108808		0.0515464		0.1		0	b	0.015544		0.0103093		0.0333333	a	0	b	0.11399		0.0515464		0.1		0	b
Breakfast cereals	0.798283		0.846154		0.831461		0.516129	b	0.317597		0.3		0.292135		0.0967742	b	0.806867		0.853846		0.842697		0.516129	b
Breads and similar products	0.504673		0.4		0.393939		0.0784314	b	0.0747664		0.0761905		0.111111	a	0.0196078	b	0.504673		0.4		0.393939		0.0980392	b
Fine bakery wares (biscuits)	0.26616		0.290323		0.275		0.0357143	b	0.0532319		0.0725806		0.0625		0	b	0.26616		0.290323		0.275		0.0357143	b
Pasta & rice	0.282353		0.228723		0.251908		0.111111	b	0.138235		0.117021		0.10687		0.166667	*	0.341176		0.292553		0.328244		0.166667	b
Fruit juice & smoothies	0.962963		0.974359		0.944444		0.965517		0.153439	a	0.141026		0.111111		0.103448		0.962963		0.974359		0.944444		0.965517
Soft drinks and water	0.625		0.62069		0.640316		0.547619	b	0.0842391		0.0935961		0.0909091		0.190476	a	0.627717		0.62069		0.640316		0.571429	b
Teas	0.184375		0.352459		0.477273	a	0.175	b	0.2	a	0.131148		0.170455		0.125		0.296875		0.368852		0.477273	a	0.175	b
Peas, beans & lentils	0.114286		0.0681818		0.111111		0	b	0.0714286		0.0681818		0.0833333		0	b	0.128571		0.0909091		0.111111		0	b
Processed meats	0.1375		0.105263		0.16763	a	0.04	b	0.071875		0.0473684		0.0867052	a	0.0133333	b	0.16875		0.136842		0.196532		0.04	b
Processed seafood	0.255319		0.281553		0.307692		0.04	b	0.0159574		0.0194175		0.0769231	a	0		0.260638		0.291262		0.323077		0.04	b
Ready meals - full meal	0.219178		0.173077		0.129032		0	b	0		0		0		0		0.219178		0.173077		0.129032		0	b
Ready meals - other	0.0571429		0.0769231		0.0816327		0	b	0.0190476		0.0384615		0.0612245	a	0	b	0.0571429		0.0769231		0.0816327		0	b
Vegetable fats and oils	0.315068		0.323529		0.388889	a	0.3		0.178082		0.235294		0.296296		0	b	0.363014		0.382353		0.425926	a	0.3	b
Milk imitates	0.9375		1		1		0	b	0.03125		0.0833333		0.333333	a	0		0.9375		1		1		0	b
Yoghurt imitates (Miscellaneous dairy imitates)	0.782609		0.714286		1	a			0.565217		0.285714		1	a			0.782609		0.714286		1
Chewing gum	0		0		0		1	a	0.0888889		0.0888889		0.0652174		0.631579	a	0.0888889		0.0888889		0.0652174		1	a
TOTAL	0.373065		0.37271		0.421909		0.247748		0.127796		0.134523		0.155098		0.133634		0.396658		0.392478		0.43872		0.25976
Notes: a statistically significant higher prevalence in comparison to other stores (dual-mode criteria); b statistically significant lower prevalence in comparison to other stores (dual-mode criteria)

## Sheet: Table S3
						SHOP EXPOSURE	Nepreverjeno	Energija	Izdelek	Vitamini (vsaj 3)	Vit A (120 ug)	Provit A (beta-karoten, 720 ug)	Vit D (0,75 ug)	Vit E (1,8 mg)	Vit K (11,3 ug)	Vit B1 (Tiamin) (0,17 mg)	Vit B2 (Riboflavin) (0,21 mg)	Vit B3 (Niacin) (2,4 mg)	Vit B5 (Pantotenska kislina)	Vit B6 (Piridoksin) (0,21 mg)	Vit B9 (Folna k./Folat) (30 ug)	Vit B12 (Cianokobalamin) (0,3 ug)	Vit C (Askorbinska k.) (12 mg)	biotin	Minerali (vsaj 3)	Baker (0,15 mg)	Cink (1,5 mg)	Fluorid (0,53 mg)	Fosfor (105 mg)	Jod (22,5 ug)	Kalcij (120 mg)	Kalij (300 mg)	Klorid (120 mg)	Krom (6 ug)	Magnezij (56,3 mg)	Mangan (0,3 mg)	Molibden (7,5 ug)	Natrij/Sol	Selen (8,25 ug)	Železo (2,1 mg)	Maščobe	Nasičene maščobe	Nenasičene maščobe	Enkrat nenasičene maščobe	Večkrat nenasičene maščobe	Omega-3	EPA	EPA/DHA	ALA - alfa linolenska k.
MAJOR	ID	FOODEX	Food category	Level	EM	SKUPAJ		Energy		Vitamin(s)	Vitamin A		Vitamin D	Vitamin E	Vitamin K	Thiamin (B1)	Riboflavin (B2)	Niacin (B3)	Pantothenic acid	Vitamin B6	Folic acid	Vitamin B12	Vitamin C	Biotin	Mineral(s)	Copper	Zinc	Fluoride	Phosphorus	Iodine	Calcium	Potassium	Chloride	Chromium	Magnesium	Manganese	Molybdenum	Sodium/Salt	Selenium	Iron	Fat	SFA	UFA	MUFA	PUFA	Omega-3
1	1		Milk			53	NULL	NULL	NULL	3	2	NULL	1	2	NULL	1	1	1	NULL	1	NULL	NULL	NULL	NULL	25	NULL	NULL	NULL	2	NULL	25	NULL	NULL	NULL	1	NULL	NULL	NULL	NULL	NULL	1	NULL	NULL	NULL	NULL	1	NULL	NULL	NULL
	11753	A02LY	Cow milk, whole	4		25	NULL	NULL	NULL	NULL	NULL	NULL	NULL	NULL	NULL	NULL	NULL	NULL	NULL	NULL	NULL	NULL	NULL	NULL	10	NULL	NULL	NULL	1	NULL	10	NULL	NULL	NULL	NULL	NULL	NULL	NULL	NULL	NULL	NULL	NULL	NULL	NULL	NULL	NULL	NULL	NULL	NULL
	11754	A02LZ	Cow milk, semi skimmed	4		23	NULL	NULL	NULL	3	2	NULL	1	2	NULL	1	1	1	NULL	1	NULL	NULL	NULL	NULL	13	NULL	NULL	NULL	1	NULL	13	NULL	NULL	NULL	1	NULL	NULL	NULL	NULL	NULL	NULL	NULL	NULL	NULL	NULL	1	NULL	NULL	NULL
1	2		Yoghurt and fermented milk drinks			294	1	1	NULL	23	3	NULL	13	6	NULL	NULL	NULL	NULL	3	16	NULL	1	6	NULL	37	NULL	NULL	NULL	NULL	NULL	39	NULL	NULL	NULL	NULL	NULL	NULL	NULL	NULL	NULL	67	4	NULL	NULL	NULL	NULL	NULL	NULL	NULL
	11781	A02NE	Yoghurt	2		256	1	1	NULL	17	3	NULL	13	3	NULL	NULL	NULL	NULL	NULL	13	NULL	1	3	NULL	23	NULL	NULL	NULL	NULL	NULL	23	NULL	NULL	NULL	NULL	NULL	NULL	NULL	NULL	NULL	54	2	NULL	NULL	NULL	NULL	NULL	NULL	NULL
	11783	A02NG	Yoghurt, cow milk, plain	4		80	1	NULL	NULL	5	NULL	NULL	4	NULL	NULL	NULL	NULL	NULL	NULL	4	NULL	1	NULL	NULL	18	NULL	NULL	NULL	NULL	NULL	18	NULL	NULL	NULL	NULL	NULL	NULL	NULL	NULL	NULL	27	NULL	NULL	NULL	NULL	NULL	NULL	NULL	NULL
	11784	A02NH	Yoghurt, cow milk, flavoured	4		172	NULL	1	NULL	12	3	NULL	9	3	NULL	NULL	NULL	NULL	NULL	9	NULL	NULL	3	NULL	5	NULL	NULL	NULL	NULL	NULL	5	NULL	NULL	NULL	NULL	NULL	NULL	NULL	NULL	NULL	27	2	NULL	NULL	NULL	NULL	NULL	NULL	NULL
1	3		Butter and spreads			196	NULL	NULL	3	41	33	1	31	25	NULL	2	2	1	NULL	6	5	5	NULL	NULL	6	NULL	NULL	NULL	NULL	NULL	6	NULL	NULL	NULL	NULL	NULL	NULL	1	NULL	NULL	35	NULL	1	14	14	13	NULL	NULL	NULL
	12196	A039C	Butter	2		33	NULL	NULL	NULL	2	2	NULL	2	2	NULL	NULL	NULL	NULL	NULL	NULL	NULL	NULL	NULL	NULL	NULL	NULL	NULL	NULL	NULL	NULL	NULL	NULL	NULL	NULL	NULL	NULL	NULL	NULL	NULL	NULL	2	NULL	NULL	NULL	NULL	NULL	NULL	NULL	NULL
	12195	A039B	Spreadable vegetable fat emulsions	1		106	NULL	NULL	2	35	29	1	31	23	NULL	2	2	1	NULL	6	5	5	NULL	NULL	2	NULL	NULL	NULL	NULL	NULL	2	NULL	NULL	NULL	NULL	NULL	NULL	1	NULL	NULL	14	NULL	1	11	11	10	NULL	NULL	NULL
1	4		Cheese			335	NULL	NULL	5	11	10	NULL	NULL	NULL	NULL	NULL	2	NULL	NULL	NULL	NULL	2	NULL	NULL	40	NULL	NULL	NULL	9	NULL	41	NULL	NULL	NULL	NULL	NULL	NULL	NULL	NULL	NULL	20	NULL	NULL	NULL	NULL	NULL	NULL	NULL	NULL
	11826	A02QF	Fresh uncured cheese	2		87	NULL	NULL	NULL	2	2	NULL	NULL	NULL	NULL	NULL	NULL	NULL	NULL	NULL	NULL	NULL	NULL	NULL	11	NULL	NULL	NULL	1	NULL	11	NULL	NULL	NULL	NULL	NULL	NULL	NULL	NULL	NULL	10	NULL	NULL	NULL	NULL	NULL	NULL	NULL	NULL
	11843	A02RA	Brined cheese	2		20	NULL	NULL	NULL	NULL	NULL	NULL	NULL	NULL	NULL	NULL	NULL	NULL	NULL	NULL	NULL	NULL	NULL	NULL	NULL	NULL	NULL	NULL	NULL	NULL	NULL	NULL	NULL	NULL	NULL	NULL	NULL	NULL	NULL	NULL	NULL	NULL	NULL	NULL	NULL	NULL	NULL	NULL	NULL
	11850	A02RH	Soft ripened cheese	3		45	NULL	NULL	1	1	1	NULL	NULL	NULL	NULL	NULL	1	NULL	NULL	NULL	NULL	1	NULL	NULL	3	NULL	NULL	NULL	NULL	NULL	3	NULL	NULL	NULL	NULL	NULL	NULL	NULL	NULL	NULL	NULL	NULL	NULL	NULL	NULL	NULL	NULL	NULL	NULL
	11882	A02ST	Firm ripened cheeses	3		88	NULL	NULL	1	2	2	NULL	NULL	NULL	NULL	NULL	1	NULL	NULL	NULL	NULL	1	NULL	NULL	14	NULL	NULL	NULL	8	NULL	14	NULL	NULL	NULL	NULL	NULL	NULL	NULL	NULL	NULL	7	NULL	NULL	NULL	NULL	NULL	NULL	NULL	NULL
1	5		Other diary products			138	NULL	NULL	NULL	11	2	NULL	5	NULL	NULL	NULL	6	NULL	NULL	NULL	NULL	10	NULL	NULL	21	NULL	NULL	NULL	NULL	NULL	21	NULL	NULL	NULL	NULL	NULL	NULL	NULL	NULL	NULL	3	NULL	NULL	NULL	NULL	NULL	NULL	NULL	NULL
	11764	A02MK	Cream and cream products	2		38	NULL	NULL	NULL	NULL	NULL	NULL	NULL	NULL	NULL	NULL	NULL	NULL	NULL	NULL	NULL	NULL	NULL	NULL	NULL	NULL	NULL	NULL	NULL	NULL	NULL	NULL	NULL	NULL	NULL	NULL	NULL	NULL	NULL	NULL	NULL	NULL	NULL	NULL	NULL	NULL	NULL	NULL	NULL
1	6	A031F	Whole eggs			42	NULL	NULL	3	4	NULL	NULL	1	4	NULL	1	NULL	NULL	NULL	NULL	NULL	NULL	NULL	NULL	3	NULL	NULL	NULL	NULL	1	NULL	NULL	NULL	NULL	NULL	NULL	NULL	NULL	3	NULL	NULL	NULL	NULL	NULL	NULL	3	NULL	NULL	NULL
1	7		Frozen fruit & vegetables			111	NULL	NULL	NULL	NULL	NULL	NULL	NULL	NULL	NULL	NULL	NULL	NULL	NULL	NULL	NULL	NULL	NULL	NULL	1	NULL	NULL	NULL	NULL	NULL	NULL	NULL	NULL	NULL	NULL	NULL	NULL	NULL	NULL	1	NULL	NULL	NULL	NULL	NULL	1	NULL	NULL	NULL
1	8		Frozen ready meals			239	NULL	NULL	NULL	5	NULL	NULL	NULL	NULL	NULL	1	1	1	NULL	1	NULL	NULL	4	NULL	5	NULL	NULL	NULL	NULL	NULL	4	NULL	NULL	NULL	NULL	NULL	NULL	NULL	NULL	5	3	NULL	1	2	1	NULL	NULL	NULL	NULL
1	9	A00CV	Breakfast cereals			276	NULL	NULL	NULL	129	20	NULL	28	49	17	120	95	98	61	96	94	73	75	18	103	12	18	2	18	23	54	12	12	NULL	30	7	NULL	21	15	85	21	2	NULL	NULL	NULL	1	NULL	NULL	NULL
1	10	A004V	Breads and similar products			297	NULL	1	3	4	NULL	NULL	NULL	1	NULL	1	1	1	1	1	1	NULL	NULL	NULL	12	NULL	NULL	NULL	NULL	NULL	9	NULL	NULL	NULL	4	NULL	NULL	4	NULL	5	16	1	8	NULL	NULL	NULL	NULL	NULL	NULL
1	11	A009T	Fine bakery wares (biscuits)			323	NULL	1	NULL	9	5	NULL	NULL	3	NULL	6	2	5	1	5	4	NULL	5	NULL	20	NULL	NULL	NULL	6	NULL	16	NULL	NULL	NULL	4	NULL	NULL	6	NULL	16	NULL	NULL	NULL	1	1	NULL	NULL	NULL	NULL
1	12		Pasta & rice			436	NULL	NULL	NULL	14	8	NULL	NULL	1	NULL	4	NULL	5	4	6	NULL	NULL	8	NULL	32	NULL	8	NULL	14	NULL	17	NULL	NULL	NULL	12	NULL	NULL	NULL	NULL	27	16	NULL	NULL	NULL	NULL	NULL	NULL	NULL	NULL
	10043	A007D	Pasta and similar products	1		356	NULL	NULL	NULL	7	8	NULL	NULL	1	NULL	NULL	NULL	NULL	NULL	NULL	NULL	NULL	8	NULL	25	NULL	7	NULL	7	NULL	17	NULL	NULL	NULL	7	NULL	NULL	NULL	NULL	24	16	NULL	NULL	NULL	NULL	NULL	NULL	NULL	NULL
	9910	A001C	Cereal grains: Rice grains	3		80	NULL	NULL	NULL	7	NULL	NULL	NULL	NULL	NULL	4	NULL	5	4	6	NULL	NULL	NULL	NULL	7	NULL	1	NULL	7	NULL	NULL	NULL	NULL	NULL	5	NULL	NULL	NULL	NULL	3	NULL	NULL	NULL	NULL	NULL	NULL	NULL	NULL	NULL
1	13		Fruit juice & smoothies			240	NULL	1	6	69	11	8	NULL	13	NULL	13	11	15	14	16	6	6	64	13	20	NULL	NULL	NULL	NULL	NULL	16	NULL	NULL	NULL	7	NULL	NULL	1	NULL	1	3	NULL	NULL	NULL	NULL	NULL	NULL	NULL	NULL
	12204	A039L	Fruit juices	1		118	NULL	NULL	4	36	3	1	NULL	3	NULL	2	5	4	3	5	1	1	35	2	10	NULL	NULL	NULL	NULL	NULL	6	NULL	NULL	NULL	3	NULL	NULL	NULL	NULL	1	3	NULL	NULL	NULL	NULL	NULL	NULL	NULL	NULL
	12239	A03BB	Fruit nectar	1		104	NULL	2	NULL	28	8	3	NULL	10	NULL	9	4	10	10	10	6	6	27	10	7	NULL	NULL	NULL	NULL	NULL	7	NULL	NULL	NULL	2	NULL	NULL	NULL	NULL	NULL	NULL	NULL	NULL	NULL	NULL	NULL	NULL	NULL	NULL
1	14		Soft drinks and water			459	NULL	91	19	107	21	2	NULL	31	NULL	30	16	65	67	70	44	56	61	31	43	NULL	2	NULL	3	NULL	28	13	7	NULL	22	NULL	NULL	16	NULL	1	NULL	NULL	NULL	NULL	NULL	NULL	NULL	NULL	NULL
	12291	A03DK	Drinking water	1		137	NULL	67	NULL	12	NULL	NULL	NULL	NULL	NULL	NULL	NULL	12	12	12	12	10	NULL	10	7	NULL	NULL	NULL	NULL	NULL	2	NULL	NULL	NULL	7	NULL	NULL	16	NULL	NULL	NULL	NULL	NULL	NULL	NULL	NULL	NULL	NULL	NULL
	12296	A03DQ	Natural mineral water	2		61	NULL	1	NULL	NULL	NULL	NULL	NULL	NULL	NULL	NULL	NULL	NULL	NULL	NULL	NULL	NULL	NULL	NULL	5	NULL	NULL	NULL	NULL	NULL	2	NULL	NULL	NULL	5	NULL	NULL	5	NULL	NULL	NULL	NULL	NULL	NULL	NULL	NULL	NULL	NULL	NULL
	12297	A03DR	Still natural mineral water	3		38	NULL	1	NULL	NULL	NULL	NULL	NULL	NULL	NULL	NULL	NULL	NULL	NULL	NULL	NULL	NULL	NULL	NULL	NULL	NULL	NULL	NULL	NULL	NULL	NULL	NULL	NULL	NULL	NULL	NULL	NULL	5	NULL	NULL	NULL	NULL	NULL	NULL	NULL	NULL	NULL	NULL	NULL
	12298	A03DS	Carbonated natural mineral water	3		23	NULL	NULL	NULL	NULL	NULL	NULL	NULL	NULL	NULL	NULL	NULL	NULL	NULL	NULL	NULL	NULL	NULL	NULL	5	NULL	NULL	NULL	NULL	NULL	2	NULL	NULL	NULL	5	NULL	NULL	NULL	NULL	NULL	NULL	NULL	NULL	NULL	NULL	NULL	NULL	NULL	NULL
	12302	A03DY	Flavoured bottled water	2		76	NULL	66	NULL	12	NULL	NULL	NULL	NULL	NULL	NULL	NULL	12	12	12	12	10	NULL	10	2	NULL	NULL	NULL	NULL	NULL	NULL	NULL	NULL	NULL	2	NULL	NULL	11	NULL	NULL	NULL	NULL	NULL	NULL	NULL	NULL	NULL	NULL	NULL
	12303	A03DZ	Soft drinks	1		271	NULL	19	NULL	64	20	2	NULL	27	NULL	21	6	29	31	34	25	27	56	21	22	NULL	NULL	NULL	NULL	NULL	21	NULL	NULL	NULL	2	NULL	NULL	NULL	NULL	1	NULL	NULL	NULL	NULL	NULL	NULL	NULL	NULL	NULL
	12347	A03FZ	Functional drinks	1		41	NULL	3	19	31	NULL	NULL	NULL	4	NULL	11	12	25	25	25	6	18	6	1	17	NULL	2	NULL	3	NULL	8	13	7	NULL	15	NULL	NULL	NULL	NULL	NULL	NULL	NULL	NULL	NULL	NULL	NULL	NULL	NULL	NULL
	12348	A03GA	Energy drinks	2		21	NULL	2	NULL	20	NULL	NULL	NULL	NULL	NULL	6	10	19	19	20	NULL	17	1	NULL	NULL	NULL	NULL	NULL	NULL	NULL	NULL	NULL	NULL	NULL	NULL	NULL	NULL	NULL	NULL	NULL	NULL	NULL	NULL	NULL	NULL	NULL	NULL	NULL	NULL
	12349	A03GB	Isotonic and sport drinks	2		20	NULL	1	19	11	NULL	NULL	NULL	4	NULL	5	2	6	6	5	6	1	5	1	17	NULL	2	NULL	3	NULL	8	13	7	NULL	15	NULL	NULL	NULL	NULL	NULL	NULL	NULL	NULL	NULL	NULL	NULL	NULL	NULL	NULL
1	15		Teas			362	NULL	NULL	4	14	1	NULL	1	4	NULL	4	4	4	4	4	3	4	13	4	2	NULL	NULL	NULL	NULL	NULL	NULL	NULL	NULL	NULL	NULL	NULL	NULL	NULL	NULL	NULL	NULL	NULL	NULL	NULL	NULL	NULL	NULL	NULL	NULL
	12384	A03HQ	Tea leaves	2		68	NULL	NULL	2	NULL	NULL	NULL	NULL	NULL	NULL	NULL	NULL	NULL	NULL	NULL	NULL	NULL	NULL	NULL	1	NULL	NULL	NULL	NULL	NULL	NULL	NULL	NULL	NULL	NULL	NULL	NULL	NULL	NULL	NULL	NULL	NULL	NULL	NULL	NULL	NULL	NULL	NULL	NULL
	12442	A03LG	Herbal and other non-tea infusions	2		294	NULL	NULL	2	14	1	NULL	1	4	NULL	4	4	4	4	4	3	4	13	4	1	NULL	NULL	NULL	NULL	NULL	NULL	NULL	NULL	NULL	NULL	NULL	NULL	NULL	NULL	NULL	NULL	NULL	NULL	NULL	NULL	NULL	NULL	NULL	NULL
1	16		Peas, beans & lentils			97	NULL	NULL	NULL	5	NULL	NULL	NULL	NULL	NULL	4	NULL	NULL	4	1	4	NULL	NULL	NULL	5	NULL	4	NULL	5	NULL	NULL	NULL	NULL	NULL	5	NULL	NULL	NULL	NULL	1	NULL	NULL	NULL	NULL	NULL	NULL	NULL	NULL	NULL
1	17		Processed meats			429	NULL	NULL	1	1	1	NULL	NULL	NULL	NULL	NULL	NULL	NULL	NULL	NULL	NULL	1	NULL	NULL	NULL	NULL	NULL	NULL	NULL	NULL	NULL	NULL	NULL	NULL	NULL	NULL	NULL	2	NULL	NULL	18	4	NULL	1	2	4	NULL	NULL	NULL
1	18		Processed seafood			237	NULL	2	NULL	11	1	NULL	NULL	5	NULL	NULL	NULL	7	NULL	3	NULL	8	NULL	NULL	12	NULL	NULL	NULL	9	5	3	NULL	NULL	NULL	NULL	NULL	NULL	NULL	NULL	2	NULL	NULL	NULL	NULL	NULL	46	1	1	NULL
1	19		Ready meals - full meal			96	NULL	1	NULL	2	NULL	NULL	NULL	NULL	NULL	NULL	NULL	NULL	NULL	NULL	NULL	NULL	2	NULL	2	NULL	NULL	NULL	NULL	NULL	2	NULL	NULL	NULL	NULL	NULL	NULL	NULL	NULL	2	6	4	NULL	NULL	NULL	NULL	NULL	NULL	NULL
1	20		Ready meals - other			133	NULL	NULL	NULL	NULL	NULL	NULL	NULL	NULL	NULL	NULL	NULL	NULL	NULL	NULL	NULL	NULL	NULL	NULL	NULL	NULL	NULL	NULL	NULL	NULL	NULL	NULL	NULL	NULL	NULL	NULL	NULL	NULL	NULL	NULL	NULL	NULL	NULL	NULL	NULL	1	NULL	NULL	NULL
1	21	A036N	Vegetable fats and oils			194	NULL	NULL	NULL	36	NULL	NULL	NULL	35	1	NULL	NULL	NULL	NULL	1	NULL	NULL	NULL	NULL	1	NULL	1	NULL	NULL	NULL	NULL	NULL	NULL	NULL	NULL	NULL	NULL	NULL	NULL	NULL	NULL	1	4	13	4	13	NULL	NULL	NULL
	12142	A036P	Olive oils	2		61	NULL	NULL	NULL	6	NULL	NULL	NULL	6	NULL	NULL	NULL	NULL	NULL	NULL	NULL	NULL	NULL	NULL	NULL	NULL	NULL	NULL	NULL	NULL	NULL	NULL	NULL	NULL	NULL	NULL	NULL	NULL	NULL	NULL	NULL	NULL	NULL	8	NULL	1	NULL	NULL	NULL
	12146	A036T	Seed oils	2		133	NULL	NULL	NULL	30	NULL	NULL	NULL	29	1	NULL	NULL	NULL	NULL	1	NULL	NULL	NULL	NULL	1	NULL	1	NULL	NULL	NULL	NULL	NULL	NULL	NULL	NULL	NULL	NULL	NULL	NULL	NULL	NULL	1	4	5	4	12	NULL	NULL	NULL
	12154	A037D	Sunflower seed oil, edible	3		26	NULL	NULL	NULL	9	NULL	NULL	NULL	9	NULL	NULL	NULL	NULL	NULL	NULL	NULL	NULL	NULL	NULL	NULL	NULL	NULL	NULL	NULL	NULL	NULL	NULL	NULL	NULL	NULL	NULL	NULL	NULL	NULL	NULL	NULL	NULL	NULL	1	NULL	1	NULL	NULL	NULL
	12158	A037H	Pumpkinseed oil	3		21	NULL	NULL	NULL	5	NULL	NULL	NULL	5	NULL	NULL	NULL	NULL	NULL	NULL	NULL	NULL	NULL	NULL	1	NULL	1	NULL	NULL	NULL	NULL	NULL	NULL	NULL	NULL	NULL	NULL	NULL	NULL	NULL	NULL	NULL	1	1	NULL	1	NULL	NULL	NULL
1	22	A03TH	Milk imitates			35	NULL	NULL	5	3	1	NULL	3	NULL	NULL	NULL	NULL	NULL	NULL	NULL	NULL	NULL	NULL	NULL	12	NULL	NULL	NULL	NULL	NULL	12	NULL	NULL	NULL	NULL	NULL	NULL	1	NULL	NULL	NULL	NULL	NULL	NULL	NULL	4	NULL	NULL	NULL
	12598	A03TJ	Soya drink	3		18	NULL	NULL	1	3	1	NULL	3	NULL	NULL	NULL	NULL	NULL	NULL	NULL	NULL	NULL	NULL	NULL	10	NULL	NULL	NULL	NULL	NULL	10	NULL	NULL	NULL	NULL	NULL	NULL	1	NULL	NULL	NULL	NULL	NULL	NULL	NULL	4	NULL	NULL	NULL
1	23	A03TQ	Yoghurt imitates (Miscellaneous dairy imitates)			27	NULL	NULL	NULL	5	NULL	NULL	5	NULL	NULL	NULL	5	NULL	NULL	NULL	NULL	5	NULL	NULL	11	NULL	NULL	NULL	NULL	NULL	11	NULL	NULL	NULL	NULL	NULL	NULL	1	NULL	NULL	6	NULL	NULL	NULL	NULL	5	NULL	NULL	NULL
1	24	A035M	Chewing gum			55	NULL	NULL	NULL	NULL	NULL	NULL	NULL	NULL	NULL	NULL	NULL	NULL	NULL	NULL	NULL	NULL	NULL	NULL	NULL	NULL	NULL	NULL	NULL	NULL	NULL	NULL	NULL	NULL	NULL	NULL	NULL	NULL	NULL	NULL	NULL	NULL	NULL	NULL	NULL	NULL	NULL	NULL	NULL
			SKUPAJ			5104	1	98	49	507	119	11	88	179	18	187	146	203	159	227	161	171	238	66	413	12	33	2	66	29	304	25	19	0	85	7	0	53	18	146	215	16	14	31	22	92	1	1	0
[truncated: 231 more columns]

## Sheet: Table S4
Table S4. Proportion of prepacked foods (per food category) with different categories of health claims according to the FOODEX2 categorisation.
			Health claim category				Health relationship (classification according to ICF/WHO body functions)
FOODEX2	Food category	N	General non-specific health claims	Function claims	Children's development and health	Reduction of disease risk claims	Mental functions (b1)	Cardiovascular system functions (b410-b429)	Haematological system functions (b430)	- Blood cholesterol levels (b4302)	Immunological system functions (b435)	Digestive system functions (b510-b539)	- Glycaemic response (b5152)	- Weight maintenance functions (b530)	Metabolic functions (b540-b559)	Bones (b720) & teeth functions (b5101)	Muscle functions (b730-b749)	Functions of the skin, hair and nails (b810-b869)
	Milk	53		0.0754717	0.0188679	0.0377358		0.0188679	0.0188679	0.0188679	0.0188679	0.0188679				0.0188679
A02LY	Cow milk, whole	25
A02LZ	Cow milk, semi skimmed	23		0.173913	0.0434783	0.0869565		0.0434783	0.0434783	0.0434783	0.0434783	0.0434783				0.0434783
	Yoghurt and fermented milk drinks	294	0.353741	0.241497		0.0102041	0.00340136		0.0102041	0.0102041	0.0714286	0.122449		0.0272109		0.0238095
A02NE	Yoghurt	256	0.304688	0.25		0.0117188			0.0117188	0.0117188	0.0742188	0.125		0.03125		0.0273438
A02NG	Yoghurt, cow milk, plain	80	0.3	0.2375		0.0125			0.0125	0.0125	0.0625	0.1125		0.0375		0.05
A02NH	Yoghurt, cow milk, flavoured	172	0.313953	0.261628		0.0116279			0.0116279	0.0116279	0.0813953	0.0813953		0.0290698		0.0174419
	Butter and spreads	196	0.137755	0.0459184		0.00510204	0.0102041	0.0204082	0.0204082	0.0204082		0.00510204
A039C	Butter	33	0.030303
A039B	Spreadable vegetable fat emulsions	106	0.141509	0.0754717		0.00943396	0.0188679	0.0283019	0.0377358	0.0377358		0.00943396
	Cheese	335	0.00895522	0.00895522							0.00597015	0.00895522
A02QF	Fresh uncured cheese	87	0.0114943	0.0114943								0.0114943
A02RA	Brined cheese	20
A02RH	Soft ripened cheese	45
A02ST	Firm ripened cheeses	88	0.0113636	0.0113636							0.0113636	0.0113636
	Other dairy products	138		0.0362319												0.0362319
A02MK	Cream and cream products	38
A031F	Whole eggs	42		0.047619				0.047619
	Frozen fruit & vegetables	111	0.00900901
	Frozen ready meals	239	0.0209205
A00CV	Breakfast cereals	276	0.101449	0.195652	0.0108696	0.00362319	0.057971	0.0253623	0.0289855	0.0253623	0.0253623	0.0724638	0.0326087	0.0724638	0.0108696	0.0253623	0.00724638	0.00362319
A004V	Breads and similar products	297	0.040404	0.040404	0.003367	0.00673401			0.010101	0.010101	0.003367	0.023569	0.013468	0.013468	0.003367	0.00673401	0.003367
A009T	Fine bakery wares (biscuits)	323	0.0154799	0.0433437			0.00309598				0.00928793	0.0309598	0.00928793	0.0154799	0.00928793			0.00928793
	Pasta & rice	436	0.00917431	0.0802752			0.00229358		0.00229358	0.00229358	0.00229358	0.0504587	0.0412844	0.0298165		0.00229358	0.00229358
A007D	Pasta and similar products	356	0.011236	0.0983146			0.00280899		0.00280899	0.00280899	0.00280899	0.0617978	0.0505618	0.0365169		0.00280899	0.00280899
A001C	Cereal grains: Rice grains	80
	Fruit juice & smoothies	240	0.0625	0.0916667	0.00416667		0.0166667	0.0125			0.0333333	0.0125		0.0125				0.00416667
A039L	Fruit juices	118	0.110169	0.118644	0.00847458		0.0254237	0.0169492			0.0508475			0.0169492
A03BB	Fruit nectar	104
	Soft drinks and water	459	0.037037	0.0762527			0.0239651				0.0174292	0.0261438	0.0108932	0.0239651	0.0174292	0.0196078	0.00653595
A03DK	Drinking water	137	0.0875912	0.138686			0.0291971				0.00729927	0.0510949		0.080292	0.0291971	0.0364964	0.0218978
A03DQ	Natural mineral water	61	0.0163934	0.0655738							0.0163934	0.0491803				0.0491803	0.0491803
A03DR	Still natural mineral water	38	0.0263158	0.0263158							0.0263158
A03DS	Carbonated natural mineral water	23		0.130435								0.130435				0.130435	0.130435
A03DY	Flavoured bottled water	76	0.144737	0.197368			0.0526316					0.0526316		0.144737	0.0526316	0.0263158
A03DZ	Soft drinks	271	0.0184502	0.0258303							0.0258303	0.0147601	0.0147601		0.0147601	0.0147601
A03FZ	Functional drinks	41		0.219512			0.170732					0.0243902	0.0243902
A03GA	Energy drinks	21
A03GB	Isotonic and sport drinks	20		0.45			0.35					0.05	0.05
	Teas	362	0.0303867	0.171271			0.038674		0.0110497		0.0911602	0.0635359		0.0138122	0.00276243			0.00828729
A03HQ	Tea leaves	68	0.0147059	0.161765			0.0147059				0.147059	0.0147059
A03LG	Herbal and other non-tea infusions	294	0.0340136	0.173469			0.0442177		0.0136054		0.0782313	0.0748299		0.0170068	0.00340136			0.0102041
	Peas, beans & lentils	97	0.0103093	0.0103093					0.0103093		0.0103093	0.0103093	0.0103093		0.0103093		0.0103093
	Processed meats	429	0.048951	0.002331							0.002331			0.002331
	Processed seafood	237	0.021097	0.00843882				0.00843882
	Ready meals - full meal	96
	Ready meals - other	133	0.0075188	0.0225564					0.0075188	0.0075188	0.0075188	0.0075188		0.0075188
A036N	Vegetable fats and oils	194	0.0515464	0.0773196		0.0154639	0.0103093	0.056701	0.00515464	0.00515464	0.0206186	0.0154639			0.00515464			0.00515464
A036P	Olive oils	61	0.0163934
A036T	Seed oils	133	0.0676692	0.112782		0.0225564	0.0150376	0.0827068	0.0075188	0.0075188	0.0300752	0.0225564			0.0075188			0.0075188
A037D	Sunflower seed oil, edible	26	0.0384615	0.153846				0.153846
A037H	Pumpkinseed oil	21	0.047619	0.047619		0.047619		0.047619	0.047619	0.047619
A03TH	Milk imitates	35	0.0571429
A03TJ	Soya drink	18	0.111111
A03TQ	Yoghurt imitates	27	0.555556	0.0740741										0.0740741
A035M	Chewing gum	55		0.0909091							0.0181818					0.0727273
	TOTAL	5104	0.0562304	0.0699451	0.00117555	0.0023511	0.0101881	0.00587774	0.00528997	0.00411442	0.018221	0.0280172	0.00783699	0.0143025	0.00352665	0.00705329	0.0015674	0.00176332
